# Supplementary material
Source: PubMed Central journal article supplement (PMC7992920)
Supplement: NIHMS1676904-supplement-Supplementary_Table.pdf [file NIHMS1676904-supplement-Supplementary_Table.pdf]

---

**Supplementary information**

---

**A hitchhiker's guide to working with large,  
open-source neuroimaging datasets**

---

In the format provided by the  
authors and unedited

| <b>Abbreviations</b> | <b>Full name</b>                                              |
|----------------------|---------------------------------------------------------------|
| 1000BRAINS           | 1000 Brains study                                             |
| 1000 FCP             | 1000 Functional Connectomes Project                           |
| ABCD                 | Adolescent Brain Cognitive Development study                  |
| ABIDE                | Autism Brain Imaging Data Exchange initiative                 |
| ADHD-200             | Attention Deficit Hyperactivity Disorder 200 sample           |
| ADNI                 | Alzheimer's Disease Neuroimaging Initiative                   |
| AOMIC                | Amsterdam Open MRI Collection                                 |
| Cam-CAN              | Cambridge Centre for Ageing Neuroscience                      |
| C-BIGR               | Clinical Biologic Imaging and Genetic Repository              |
| COBRE                | Center for Biomedical Research Excellence                     |
| COINS                | Collaborative Informatics and Neuroimaging Suite              |
| CoRR                 | Consortium for Reliability and Reproducibility                |
| GSP                  | Brain Genomics Superstruct Project                            |
| HBN                  | Healthy Brain Network                                         |
| HCP                  | Human Connectome Project                                      |
| IBIS                 | Infant Brain Imaging Study                                    |
| INDI                 | International Neuroimaging Data-sharing Initiative            |
| LORIS                | Longitudinal Online Research and Imaging System               |
| MCIC                 | MIND Clinical Imaging Consortium                              |
| NDA                  | National Institute of Mental Health Data Archive              |
| NITRC-IR             | NeuroImaging Tools & Resources Collaboratory Image Repository |
| NKI-RS               | Nathan Kline Institute Rockland Sample                        |
| OASIS-3              | Open Access Series of Imaging Studies                         |
| PNC                  | Philadelphia Neurodevelopmental Cohort                        |
| PPMI                 | Parkinson's Progression Markers Initiative                    |

Supplementary Table 1. Abbreviations for datasets and repositories listed in Figure 1.
